# Supplementary material
Source: publisher site journal article supplement (https://www.degruyterbrill.com/publication/isbn/9783110286274/downloadAsset/9783110286274_Inhaltsverzeichnis.pdf)
Supplement: Supplementary file 1 [file 9783110286274_Inhaltsverzeichnis.pdf]

# Inhaltsverzeichnis

|                                      | Seite |
|--------------------------------------|-------|
| Verzeichnis über die Fälle . . . . . | XXI   |

## 1. Kapitel – Einleitung

|                                                                                                         |    |
|---------------------------------------------------------------------------------------------------------|----|
| A. Entwicklung der Urheberrechtsgesetzgebung in Deutschland . . . . .                                   | 4  |
| B. Urheberrechtstheorien . . . . .                                                                      | 11 |
| I. Theorie vom Geistigen Eigentum . . . . .                                                             | 11 |
| II. Dualistische Theorie . . . . .                                                                      | 14 |
| III. Monistische Theorie . . . . .                                                                      | 14 |
| C. Regelungsinhalt des Urheberrechts . . . . .                                                          | 16 |
| D. Urheberrecht und Grundrechte . . . . .                                                               | 18 |
| E. Funktionen des Urheberrechts . . . . .                                                               | 21 |
| I. Innovationsfunktion . . . . .                                                                        | 21 |
| II. Vergütungsfunktion . . . . .                                                                        | 23 |
| III. Kommunikationsfunktion . . . . .                                                                   | 26 |
| IV. Schutzfunktion . . . . .                                                                            | 27 |
| F. Urheberrecht und Copyright . . . . .                                                                 | 28 |
| G. Europäische Harmonisierung des nationalen Urheberrechts . . . . .                                    | 29 |
| H. Geistiges Werk und körperliches Werkstück . . . . .                                                  | 30 |
| I. Urheberrecht und Kunstfreiheit . . . . .                                                             | 33 |
| J. Urheberrecht und allgemeines Persönlichkeitsrecht . . . . .                                          | 36 |
| I. Form und Inhalt einer Schmähkritik . . . . .                                                         | 36 |
| II. Spannungsverhältnis zwischen persönlichkeitsrechtlichem Bildnisschutz<br>und Urheberrecht . . . . . | 38 |
| K. Sozialgebundenheit des Urheberrechts und Informationsfreiheit . . . . .                              | 40 |
| L. Urheberrecht und gewerbliche Schutzrechte . . . . .                                                  | 42 |
| I. Gemeinsamkeiten und Unterschiede . . . . .                                                           | 42 |
| II. Doppelter Rechtsschutz . . . . .                                                                    | 42 |
| 1. Urheberrecht und Patentrecht . . . . .                                                               | 42 |
| 2. Urheberrecht und Geschmacksmusterrecht . . . . .                                                     | 44 |
| 3. Urheberrecht und Markenrecht . . . . .                                                               | 46 |
| 4. Urheberrecht und Wettbewerbsrecht . . . . .                                                          | 47 |
| M. Perspektive des Urheberrechts? . . . . .                                                             | 51 |
| Wiederholungsfragen . . . . .                                                                           | 60 |

## 2. Kapitel – Das Werk

|                                                                                | Seite |
|--------------------------------------------------------------------------------|-------|
| A. Werkbegriff                                                                 | 61    |
| I. Schutzuoraussetzungen                                                       | 61    |
| 1. Merkmale der persönlichen geistigen Schöpfung, § 2 Abs. 2 UrhG              | 61    |
| a) Persönliche Schöpfung                                                       | 61    |
| b) Geistiger Inhalt                                                            | 61    |
| c) Wahrnehmbare konkrete Form                                                  | 61    |
| d) Individualität                                                              | 62    |
| e) Gestaltungshöhe                                                             | 62    |
| 2. Umfang des Werkbegriffs                                                     | 63    |
| a) Während der Schaffensphase                                                  | 63    |
| b) Unvollendete Leistungen                                                     | 63    |
| c) Andere Werkarten                                                            | 63    |
| d) Einzelne Werkteile                                                          | 63    |
| e) Schutzzumfang                                                               | 63    |
| f) Schutzausschluss – Freihaltebedürfnis                                       | 64    |
| g) Nicht maßgebliche Eigenschaften                                             | 64    |
| aa) Zweck der Gestaltung                                                       | 64    |
| bb) Herstellungsaufwand und Kosten                                             | 64    |
| cc) Qualitativer Inhalt                                                        | 64    |
| Wiederholungsfragen                                                            | 65    |
| II. Geschützte Werkarten                                                       | 65    |
| 1. Sprachwerke                                                                 | 65    |
| a) Schriftwerke                                                                | 65    |
| b) Reden                                                                       | 68    |
| c) Computerprogramme                                                           | 68    |
| 2. Werke der Musik                                                             | 68    |
| 3. Choreographische und pantomimische Werke                                    | 69    |
| 4. Werke der bildenden Künste, Werke der Baukunst, Werke der angewandten Kunst | 70    |
| a) Werke der reinen bildenden Kunst                                            | 70    |
| b) Werke der Baukunst                                                          | 71    |
| c) Werke der angewandten Kunst                                                 | 72    |
| 5. Lichtbildwerke                                                              | 75    |
| 6. Filmwerke                                                                   | 76    |
| a) Begriff                                                                     | 76    |
| b) Werke, die ähnlich wie Filmwerke geschaffen werden                          | 77    |
| c) Werkteile                                                                   | 78    |
| d) Fernsehshowformate                                                          | 78    |
| e) Urheber des Filmwerks                                                       | 78    |
| 7. Darstellungen wissenschaftlicher oder technischer Art                       | 78    |
| 8. Internetbezogene und andere Werkarten                                       | 80    |
| a) Homepage                                                                    | 80    |
| b) Weblog (Blog)                                                               | 80    |
| c) Webadressbücher, Portfolios                                                 | 80    |
| d) Multimediawerk                                                              | 80    |

|                                                                        |       |
|------------------------------------------------------------------------|-------|
|                                                                        | Seite |
| e) Werbekonzeption . . . . .                                           | 81    |
| Wiederholungsfragen . . . . .                                          | 81    |
| III. Bearbeitungen . . . . .                                           | 82    |
| 1. Begriff . . . . .                                                   | 82    |
| a) Anforderungen an die Art der Bearbeitung . . . . .                  | 82    |
| b) Abhängigkeit der Bearbeitung vom Ausgangswerk . . . . .             | 84    |
| 2. Bearbeitungen einzelner Werkarten . . . . .                         | 85    |
| 3. Bearbeiterurheberrecht . . . . .                                    | 86    |
| Wiederholungsfragen . . . . .                                          | 87    |
| IV. Sammelwerke und Datenbankwerke . . . . .                           | 87    |
| V. Amtliche Werke . . . . .                                            | 87    |
| 1. Systematik des § 5 UrhG . . . . .                                   | 87    |
| 2. Begriff „amtliches Werk“ . . . . .                                  | 87    |
| 3. Andere amtliche Werke, § 5 Abs. 2 UrhG . . . . .                    | 88    |
| a) Amtliches Interesse . . . . .                                       | 88    |
| b) Zur allgemeinen Kenntnisnahme veröffentlicht . . . . .              | 89    |
| c) Änderungsverbot und Quellenangabe . . . . .                         | 89    |
| 4. Sonstige amtliche Werke, § 5 Abs. 3 UrhG . . . . .                  | 89    |
| a) Private Normwerke . . . . .                                         | 89    |
| b) Zwangslizenz, § 5 Abs. 3 S. 2 und 3 UrhG . . . . .                  | 90    |
| Wiederholungsfragen . . . . .                                          | 91    |
| VI. Veröffentlichte und erschienene Werke, § 6 UrhG . . . . .          | 91    |
| 1. Veröffentlichte Werke, § 6 Abs. 1 UrhG . . . . .                    | 91    |
| 2. Erschienene Werke, § 6 Abs. 2 UrhG . . . . .                        | 92    |
| Wiederholungsfragen . . . . .                                          | 93    |
| B. Die Urheberschaft . . . . .                                         | 94    |
| I. Urheber, § 7 UrhG . . . . .                                         | 94    |
| 1. Werkschöpfer . . . . .                                              | 94    |
| 2. Schöpfungsakt . . . . .                                             | 94    |
| 3. Mitwirkung mehrerer . . . . .                                       | 94    |
| 4. Schöpfungsprinzip im Arbeitsverhältnis . . . . .                    | 95    |
| Wiederholungsfragen . . . . .                                          | 96    |
| II. Miturheber, § 8 UrhG . . . . .                                     | 96    |
| 1. Gemeinsames Schaffen einer persönlichen Leistung mehrerer . . . . . | 96    |
| 2. Rechtsfolgen der Miturheberschaft . . . . .                         | 98    |
| 3. Rechte und Pflichten, § 8 Abs. 2 UrhG . . . . .                     | 98    |
| 4. Erträgnisverteilung, § 8 Abs. 3 UrhG . . . . .                      | 101   |
| Wiederholungsfragen . . . . .                                          | 101   |
| III. Urheber verbundener Werke, § 9 UrhG . . . . .                     | 101   |
| 1. Begriff . . . . .                                                   | 102   |
| 2. Gesellschaftsverhältnis . . . . .                                   | 103   |
| Wiederholungsfragen . . . . .                                          | 103   |
| IV. Urhebervermutung, § 10 UrhG . . . . .                              | 103   |
| Wiederholungsfragen . . . . .                                          | 105   |

### 3. Kapitel – Rechte des Urhebers

|                                                                            | Seite |
|----------------------------------------------------------------------------|-------|
| I. Urheberpersönlichkeitsrechte                                            | 106   |
| 1. Begriff und Inhalt                                                      | 106   |
| 2. Schutzzweck                                                             | 106   |
| 3. Besondere Merkmale des Urheberpersönlichkeitsrechts                     | 107   |
| a) Unübertragbarkeit                                                       | 107   |
| b) Vererblichkeit                                                          | 107   |
| 4. Schutzfrist                                                             | 109   |
| 5. Ersatz des immateriellen Schadens                                       | 109   |
| 6. Veröffentlichungsrecht, § 12 UrhG                                       | 109   |
| Fall 1                                                                     | 109   |
| Fall 2                                                                     | 110   |
| Lösung Fall 1                                                              | 112   |
| Lösung Fall 2                                                              | 113   |
| 7. Recht auf Anerkennung der Urheberschaft, § 13 UrhG                      | 113   |
| Fall 3                                                                     | 113   |
| Lösung Fall 3                                                              | 118   |
| 8. Recht gegen Entstellung und Beeinträchtigung, § 14 UrhG                 | 118   |
| Fall 4                                                                     | 118   |
| Fall 5                                                                     | 118   |
| Fall 6                                                                     | 119   |
| a) Entstellung und Beeinträchtigung                                        | 120   |
| b) Eignung zur Interessengefährdung                                        | 122   |
| c) Interessenabwägung                                                      | 122   |
| d) Werkzerstörung                                                          | 125   |
| e) Gröbliche Entstellungen und Beeinträchtigungen von Filmwerken           | 126   |
| Lösung Fall 4                                                              | 127   |
| Lösung Fall 5                                                              | 127   |
| Lösung Fall 6                                                              | 127   |
| 9. Zugangsrecht, § 25 UrhG                                                 | 128   |
| Wiederholungsfragen                                                        | 129   |
| II. Verwertungsrechte                                                      | 129   |
| 1. Allgemeines Verwertungsrecht, § 15 UrhG                                 | 129   |
| a) § 15 UrhG                                                               | 130   |
| b) Verhältnis zwischen § 15 UrhG und den einzelnen Verwertungs-<br>rechten | 130   |
| 2. Körperliche Verwertung                                                  | 130   |
| a) Vervielfältigung, § 16 UrhG                                             | 131   |
| aa) Begriff                                                                | 131   |
| bb) Abgrenzung zur Bearbeitung und freien Benutzung                        | 133   |
| b) Verbreitung, § 17 UrhG                                                  | 133   |
| aa) Begriff                                                                | 133   |
| (1) Angebot an die Öffentlichkeit                                          | 134   |
| (2) Inverkehrbringen                                                       | 134   |
| bb) Erschöpfung                                                            | 135   |
| cc) Vermietung                                                             | 136   |

|                                                                                                          | Seite |
|----------------------------------------------------------------------------------------------------------|-------|
| (1) Begriff . . . . .                                                                                    | 136   |
| (2) Ausnahmen . . . . .                                                                                  | 137   |
| c) Ausstellungsrecht, § 18 UrhG . . . . .                                                                | 137   |
| Wiederholungsfragen . . . . .                                                                            | 138   |
| 3. Unkörperliche Verwertung . . . . .                                                                    | 138   |
| a) Vortrags-, Aufführungs-, Vorführungsrecht, § 19 UrhG . . . . .                                        | 139   |
| aa) Vortragsrecht, § 19 Abs. 1 UrhG . . . . .                                                            | 139   |
| bb) Aufführungsrecht, § 19 Abs. 2 UrhG . . . . .                                                         | 140   |
| cc) Übertragung durch Bildschirm oder Lautsprecher, § 19<br>Abs. 3 UrhG . . . . .                        | 140   |
| dd) Vorführungsrecht, § 19 Abs. 4 UrhG . . . . .                                                         | 140   |
| b) Recht der öffentlichen Zugänglichmachung, § 19a UrhG . . . . .                                        | 141   |
| Fall 7 . . . . .                                                                                         | 141   |
| aa) Begriff . . . . .                                                                                    | 141   |
| bb) Abgrenzung zu anderen Verwertungsrechten . . . . .                                                   | 144   |
| cc) Fehlende Erschöpfungswirkung . . . . .                                                               | 144   |
| c) Senderecht, § 20 UrhG . . . . .                                                                       | 145   |
| d) Europäische Satellitensendung, § 20a UrhG . . . . .                                                   | 147   |
| e) Kabelweitersendung, § 20b UrhG . . . . .                                                              | 147   |
| f) Recht der Wiedergabe durch Bild- und Tonträger, § 21 UrhG . . . . .                                   | 148   |
| g) Recht der Wiedergabe von Funksendungen und von öffentlicher<br>Zugänglichmachung, § 22 UrhG . . . . . | 148   |
| Lösung Fall 7 . . . . .                                                                                  | 149   |
| Wiederholungsfragen . . . . .                                                                            | 149   |
| III. Bearbeitung und freie Benutzung . . . . .                                                           | 149   |
| Fall 8 . . . . .                                                                                         | 149   |
| 1. Bearbeitung und Umgestaltung, § 23 UrhG . . . . .                                                     | 150   |
| 2. Freie Benutzung, § 24 UrhG . . . . .                                                                  | 152   |
| Lösung Fall 8 . . . . .                                                                                  | 153   |
| 3. Antithematische Darstellung des neuen Werkes – Parodie, Karikatur<br>und Satire . . . . .             | 155   |
| Wiederholungsfragen . . . . .                                                                            | 156   |
| IV. Sonstige Verwertungsrechte . . . . .                                                                 | 156   |
| 1. Zugang zu den Werkstücken, § 25 UrhG . . . . .                                                        | 156   |
| 2. Folgerecht, § 26 UrhG . . . . .                                                                       | 156   |
| Wiederholungsfragen . . . . .                                                                            | 158   |
| 3. Vergütung für Vermietung und Verleihen, § 27 UrhG . . . . .                                           | 158   |
| a) Vergütung für Vermietung, § 27 Abs. 1 UrhG . . . . .                                                  | 158   |
| b) Vergütung für Verleihen, § 27 Abs. 2 UrhG . . . . .                                                   | 159   |
| c) Vergütungsanspruch . . . . .                                                                          | 160   |
| Wiederholungsfragen . . . . .                                                                            | 160   |

## 4. Kapitel – Urhebervertragsrecht

|                                                                                                 | Seite |
|-------------------------------------------------------------------------------------------------|-------|
| A. Einleitung Urhebervertragsrecht . . . . .                                                    | 161   |
| B. Grundsätze der Rechtseinräumung . . . . .                                                    | 162   |
| I. Trennungsprinzip . . . . .                                                                   | 162   |
| II. Abstraktionsprinzip . . . . .                                                               | 164   |
| C. Inhalt und Umfang der Rechtseinräumung . . . . .                                             | 167   |
| I. Allgemeines . . . . .                                                                        | 167   |
| II. Konstitutive und translativ Einräumung von Nutzungsrechten . . . . .                        | 168   |
| III. Nutzungsart . . . . .                                                                      | 169   |
| IV. Nutzungsrechte . . . . .                                                                    | 170   |
| V. Beschränkungen bei der Einräumung einfacher und ausschließlicher<br>Nutzungsrechte . . . . . | 172   |
| 1. Einfache und ausschließliche Nutzungsrechte . . . . .                                        | 173   |
| a) Einfaches Nutzungsrecht . . . . .                                                            | 174   |
| b) Ausschließliches Nutzungsrecht . . . . .                                                     | 175   |
| 2. Zeitliche und räumliche Beschränkung der Nutzungsrechte . . . . .                            | 175   |
| a) Räumliche Beschränkung des Nutzungsrechts . . . . .                                          | 175   |
| b) Zeitliche Beschränkung des Nutzungsrechts . . . . .                                          | 176   |
| 3. Inhaltliche Beschränkung des Nutzungsrechts . . . . .                                        | 176   |
| VI. Vertragszwecktheorie . . . . .                                                              | 177   |
| Wiederholungsfragen . . . . .                                                                   | 181   |
| D. Pflichten im Nutzungsvertrag . . . . .                                                       | 181   |
| I. Pflichten des Urhebers . . . . .                                                             | 181   |
| 1. Werkvertrag . . . . .                                                                        | 181   |
| 2. Urheberrechtlicher Nutzungsvertrag . . . . .                                                 | 182   |
| a) Rechtsverschaffungspflicht . . . . .                                                         | 182   |
| b) Enthaltungspflicht des Urhebers . . . . .                                                    | 183   |
| II. Pflichten des VerwerTERS . . . . .                                                          | 183   |
| 1. Vergütungspflicht . . . . .                                                                  | 183   |
| 2. Auswertungspflicht . . . . .                                                                 | 185   |
| E. Kein gutgläubiger Erwerb der Nutzungsrechte . . . . .                                        | 185   |
| F. Übertragung von Nutzungsrechten . . . . .                                                    | 186   |
| I. Sukzessionsschutz . . . . .                                                                  | 187   |
| II. Weiterübertragung der Nutzungsrechte . . . . .                                              | 187   |
| G. Heimfall der Nutzungsrechte . . . . .                                                        | 189   |
| Wiederholungsfragen . . . . .                                                                   | 191   |
| H. Unbekannte Nutzungsarten . . . . .                                                           | 191   |
| Fall 9 . . . . .                                                                                | 191   |
| Lösung Fall 9 . . . . .                                                                         | 192   |
| I. Altverträge und unbekannte Nutzungsart . . . . .                                             | 194   |
| I. Widerspruchsrecht des Urhebers . . . . .                                                     | 195   |
| II. Altverträge vor 1966 . . . . .                                                              | 197   |

|                                                                                           | Seite |
|-------------------------------------------------------------------------------------------|-------|
| J. Verträge über künftige Werke . . . . .                                                 | 198   |
| K. Rückrufsrecht des Urhebers von Nutzungsrechten . . . . .                               | 200   |
| I. Rückrufsrecht wegen Nichtausübung . . . . .                                            | 200   |
| II. Rückrufsrecht wegen gewandelter Überzeugung . . . . .                                 | 202   |
| III. Rückrufsrecht bei Unternehmensveräußerung . . . . .                                  | 203   |
| Wiederholungsfragen . . . . .                                                             | 203   |
| L. Anspruch auf angemessene Vergütung im Urhebervertragsrecht . . . . .                   | 203   |
| I. Angemessene Vergütung bei Vertragsabschluss . . . . .                                  | 203   |
| Fall 10 . . . . .                                                                         | 204   |
| 1. Zeitpunkt des Vertragsabschlusses . . . . .                                            | 205   |
| 2. Art und Umfang der Nutzung . . . . .                                                   | 205   |
| 3. Dauer und Zeitpunkt der Nutzung . . . . .                                              | 205   |
| 4. Übliche und redliche Vergütung . . . . .                                               | 206   |
| Lösung Fall 10 . . . . .                                                                  | 209   |
| II. Fairness-Paragraf . . . . .                                                           | 209   |
| III. Anspruch auf angemessene Vergütung für später bekannte Nutzungsarten . . . . .       | 212   |
| 1. Schriftform . . . . .                                                                  | 213   |
| 2. Widerruf des Urhebers . . . . .                                                        | 214   |
| IV. Angemessene Vergütung für Altverträge . . . . .                                       | 218   |
| M. Gemeinsame Vergütungsregeln . . . . .                                                  | 220   |
| N. Bedeutung der Allgemeinen Geschäftsbedingungen (AGB) im Urhebervertragsrecht . . . . . | 221   |
| O. Nichtigkeit von Nutzungsverträgen (§§ 134, 138 BGB) . . . . .                          | 223   |
| I. Gesetzesverstoß § 134 BGB . . . . .                                                    | 223   |
| II. Sittenwidrigkeit § 138 BGB . . . . .                                                  | 223   |
| P. Rechtsnachfolge im Urheberrecht . . . . .                                              | 224   |
| Wiederholungsfragen . . . . .                                                             | 225   |
| Q. Arbeitnehmerurheber im Arbeitsverhältnis . . . . .                                     | 225   |
| I. Allgemeiner Ausgangspunkt . . . . .                                                    | 225   |
| Fall 11 . . . . .                                                                         | 226   |
| II. Arbeitnehmerbegriff und arbeitnehmerähnliche Person . . . . .                         | 226   |
| III. Arbeits- und Dienstverhältnis . . . . .                                              | 227   |
| IV. Arbeitsverträge und Pflichtwerke . . . . .                                            | 227   |
| V. Eigentum am Arbeitsergebnis . . . . .                                                  | 228   |
| VI. Einräumung von Nutzungsrechten im Arbeits- oder Dienstverhältnis . . . . .            | 229   |
| 1. Ausgangspunkt . . . . .                                                                | 229   |
| 2. Schriftformerfordernis . . . . .                                                       | 229   |
| 3. Vertragszweck . . . . .                                                                | 230   |
| VII. Anspruch auf angemessene Vergütung . . . . .                                         | 230   |
| 1. Abgeltungstheorie . . . . .                                                            | 230   |
| 2. Trennungstheorie . . . . .                                                             | 231   |
| Lösung Fall 11 . . . . .                                                                  | 233   |
| VIII. Urheberpersönlichkeitsrecht im Dienst- oder Arbeitsverhältnis . . . . .             | 233   |

|                                                                       |       |
|-----------------------------------------------------------------------|-------|
|                                                                       | Seite |
| IX. Veröffentlichungsrecht, § 12 UrhG . . . . .                       | 233   |
| X. Recht auf Anerkennung der Urheberschaft, § 13 UrhG . . . . .       | 234   |
| XI. Entstellungen und Änderungen des Werkes, §§ 14, 39 UrhG . . . . . | 234   |
| XII. Rückrufsrechte . . . . .                                         | 235   |
| XIII. Tarifverträge (TV) . . . . .                                    | 235   |
| Wiederholungsfragen . . . . .                                         | 237   |

## 5. Kapitel – Schrankenregelungen

|                                                                                                        |     |
|--------------------------------------------------------------------------------------------------------|-----|
| Fall 12 . . . . .                                                                                      | 238 |
| A. Inhalt und Zweck der Schrankenregelungen . . . . .                                                  | 238 |
| I. Freie Nutzung . . . . .                                                                             | 238 |
| II. Zwangslizenz . . . . .                                                                             | 239 |
| III. Gesetzliche Lizenz – gesetzlicher Vergütungsanspruch . . . . .                                    | 239 |
| IV. § 24 UrhG – Schrankenregelung im Sinne des UrhG? . . . . .                                         | 240 |
| V. Drei-Stufen-Test . . . . .                                                                          | 242 |
| VI. Ausnahmenvorschriften . . . . .                                                                    | 243 |
| B. Die erlaubnis- und vergütungsfreie Nutzung . . . . .                                                | 246 |
| I. Die Zulässigkeit der öffentlichen Berichterstattung (§ 48 UrhG und § 50 UrhG) . . . . .             | 246 |
| II. Zitatrecht i.S.d. § 51 UrhG . . . . .                                                              | 248 |
| III. Vervielfältigung und öffentliche Wiedergabe als wesensnotwendige Bestandteile . . . . .           | 252 |
| 1. Vervielfältigung und öffentliche Wiedergabe in Geschäftsbetrieben, § 56 UrhG . . . . .              | 253 |
| 2. Unwesentliches Beiwerk, § 57 UrhG . . . . .                                                         | 253 |
| 3. Katalogbildfreiheit, § 58 UrhG . . . . .                                                            | 253 |
| 4. Werke an öffentlichen Plätzen, § 59 UrhG . . . . .                                                  | 254 |
| 5. Bildnisse, § 60 UrhG . . . . .                                                                      | 254 |
| IV. Vorübergehende Vervielfältigungen, § 44a UrhG . . . . .                                            | 254 |
| C. Gesetzliche Lizenz . . . . .                                                                        | 255 |
| I. Pressespiegel, § 49 UrhG . . . . .                                                                  | 255 |
| II. Vervielfältigung zum privaten und sonstigen eigenen Gebrauch, § 53 UrhG . . . . .                  | 256 |
| 1. Privatkopie i.S.d. § 53 Abs. 1 S. 1 UrhG . . . . .                                                  | 257 |
| 2. Hersteller i.S.d. § 53 Abs. 1 S. 2 UrhG . . . . .                                                   | 258 |
| 3. Zum sonstigen eigenen Gebrauch . . . . .                                                            | 259 |
| 4. Der gesetzliche Vergütungsanspruch als Ausgleich der privaten Vervielfältigung, § 54 UrhG . . . . . | 260 |
| a) Vergütungspflicht, § 54 UrhG . . . . .                                                              | 260 |
| b) Vergütungshöhe, § 54a UrhG . . . . .                                                                | 262 |
| III. Elektronischer Kopienversand . . . . .                                                            | 263 |
| IV. Zugänglichmachung zur Veranschaulichung im Unterricht . . . . .                                    | 264 |
| V. Elektronische Leseplätze . . . . .                                                                  | 265 |
| Lösung Fall 12 . . . . .                                                                               | 268 |
| Wiederholungsfragen . . . . .                                                                          | 270 |



## 6. Kapitel – Das Recht der Verwertungsgesellschaften

|                                                                             | Seite |
|-----------------------------------------------------------------------------|-------|
| A. Allgemeine Grundsätze zum Recht der Verwertungsgesellschaften . . . . .  | 271   |
| I. Zweck und Aufgabe von Verwertungsgesellschaften . . . . .                | 271   |
| II. Wahrnehmungsgrundsätze . . . . .                                        | 272   |
| III. Aufsicht über die Verwertungsgesellschaft . . . . .                    | 274   |
| IV. Gegenseitigkeitsverträge, nationale Monopole und Kartellrecht . . . . . | 274   |
| V. Organisation und Aufgabenbereich der Verwertungsgesellschaften . . . . . | 275   |
| VI. Verteilung . . . . .                                                    | 278   |
| B. GEMA . . . . .                                                           | 279   |
| I. Rechtsnatur, Aufgabe und Struktur . . . . .                              | 279   |
| II. Wahrnehmungsumfang . . . . .                                            | 280   |
| III. Probleme der Rechtswahrnehmung . . . . .                               | 281   |
| 1. Klingeltonwahrnehmung . . . . .                                          | 282   |
| 2. Werbung . . . . .                                                        | 283   |
| 3. Filmmusik . . . . .                                                      | 284   |
| 4. Bühnenwerke . . . . .                                                    | 284   |
| IV. Probleme bei der Verteilung der Einnahmen . . . . .                     | 285   |
| Wiederholungsfragen . . . . .                                               | 287   |

## 7. Kapitel – Verwandte Schutzrechte

|                                                                      |     |
|----------------------------------------------------------------------|-----|
| A. Ausgangspunkt . . . . .                                           | 288 |
| B. Leistungsschutzrechte der ausübenden Künstler . . . . .           | 289 |
| I. Historisches . . . . .                                            | 289 |
| II. Begriff des ausübenden Künstlers . . . . .                       | 290 |
| C. Persönlichkeitsrechte der ausübenden Künstler . . . . .           | 293 |
| D. Einräumung der Nutzungsrechte . . . . .                           | 295 |
| E. Vertreter der Künstlergruppen . . . . .                           | 298 |
| F. Unternehmerische Leistungen . . . . .                             | 299 |
| I. Schutz des Veranstalters . . . . .                                | 299 |
| II. Tonträger und Sendeunternehmen . . . . .                         | 301 |
| 1. Tonträger . . . . .                                               | 301 |
| Fall 13 . . . . .                                                    | 301 |
| Lösung Fall 13 . . . . .                                             | 303 |
| 2. Sendeunternehmen . . . . .                                        | 303 |
| Wiederholungsfragen . . . . .                                        | 305 |
| III. Urheber von Film- und Fernsehwerken . . . . .                   | 305 |
| Fall 14 . . . . .                                                    | 305 |
| 1. Filmurheberschaft . . . . .                                       | 305 |
| a) Urheber vorbestehender Werke i.S.d. § 88 UrhG . . . . .           | 306 |
| b) Einwilligung in die Nutzung eines vorbestehenden Werkes . . . . . | 307 |
| c) Leistungsschutzberechtigte . . . . .                              | 308 |
| d) Filmurheber i.S.d. § 89 UrhG . . . . .                            | 309 |

|                                                                                                      | Seite |
|------------------------------------------------------------------------------------------------------|-------|
| 2. Nutzungsrechtseinräumung – gesetzliche Vermutungsregelung zugunsten des Filmherstellers . . . . . | 310   |
| a) Verhältnis der Vermutungsregeln zu den §§ 133, 157 BGB und zu § 31 Abs. 5 UrhG . . . . .          | 310   |
| aa) Einräumung des Filmherstellerechts . . . . .                                                     | 311   |
| bb) Verwertung des Filmwerkes . . . . .                                                              | 311   |
| b) Einräumung von unbekannten Nutzungsarten . . . . .                                                | 313   |
| c) Sonstige Besonderheiten der Vermutungsregeln . . . . .                                            | 315   |
| 3. Einschränkung von urheberpersönlichkeitsrechtlichen Befugnissen . . . . .                         | 315   |
| 4. Originäres verwandtes Schutzrecht des Filmherstellers . . . . .                                   | 317   |
| 5. Laufbild . . . . .                                                                                | 319   |
| Lösung Fall 14 . . . . .                                                                             | 320   |
| Wiederholungsfragen . . . . .                                                                        | 321   |
| G. Sammelwerke, Datenbankwerke und Datenbanken . . . . .                                             | 321   |
| Fall 15 . . . . .                                                                                    | 321   |
| I. Sammelwerke, § 4 Abs. 1 UrhG . . . . .                                                            | 322   |
| II. Datenbankwerke, § 4 Abs. 2 UrhG . . . . .                                                        | 324   |
| III. Datenbanken, §§ 87a ff. UrhG . . . . .                                                          | 325   |
| Lösung Fall 15 . . . . .                                                                             | 328   |
| Wiederholungsfragen . . . . .                                                                        | 329   |
| H. Wissenschaftliche Ausgaben . . . . .                                                              | 329   |
| I. Nachgelassene Werke . . . . .                                                                     | 330   |
| J. Verwaiste und vergriffene Werke . . . . .                                                         | 331   |
| K. Schutz von Lichtbildern . . . . .                                                                 | 334   |
| I. Lichtbilder . . . . .                                                                             | 334   |
| II. Rechte des Fotografen . . . . .                                                                  | 334   |
| L. Schutzfristen . . . . .                                                                           | 334   |
| I. Allein- und Miturheber . . . . .                                                                  | 334   |
| II. Schutzfristen der Leistungsschutzrechte . . . . .                                                | 336   |
| 1. Ausübende Künstler . . . . .                                                                      | 336   |
| 2. Tonträgerhersteller und Sendeunternehmen . . . . .                                                | 337   |
| 3. Veranstalter . . . . .                                                                            | 338   |
| 4. Wissenschaftliche Ausgaben und nachgelassene Werke . . . . .                                      | 339   |
| 5. Lichtbilder . . . . .                                                                             | 339   |
| Wiederholungsfragen . . . . .                                                                        | 339   |

## 8. Kapitel – Softwareschutz

|                                |     |
|--------------------------------|-----|
| A. Allgemeines . . . . .       | 340 |
| Fall 16 . . . . .              | 340 |
| B. Software . . . . .          | 341 |
| I. Begriff . . . . .           | 341 |
| II. Schutzgegenstand . . . . . | 341 |

|                                                  |       |
|--------------------------------------------------|-------|
|                                                  | Seite |
| C. Besonderheiten des Softwareschutzes . . . . . | 342   |
| I. Schutzanforderungen . . . . .                 | 342   |
| II. Schutzbereichweite . . . . .                 | 343   |
| III. Schranken . . . . .                         | 346   |
| IV. Weitere Besonderheiten . . . . .             | 347   |
| Lösung Fall 16 . . . . .                         | 348   |
| Wiederholungsfragen . . . . .                    | 348   |

## 9. Kapitel – Technische Schutzmaßnahmen

|                                          |     |
|------------------------------------------|-----|
| A. Ausgangslage . . . . .                | 349 |
| B. Umgehungsverbot . . . . .             | 350 |
| C. Technische Schutzmaßnahmen . . . . .  | 351 |
| D. Umgehung . . . . .                    | 354 |
| E. Vorbereitungshandlungen . . . . .     | 355 |
| F. Verhältnis zu den Schranken . . . . . | 356 |
| G. Rechtsfolgen der Umgehung . . . . .   | 357 |
| Wiederholungsfragen . . . . .            | 358 |

## 10. Kapitel – Durchsetzung des Urheberrechts

|                                                                                      |     |
|--------------------------------------------------------------------------------------|-----|
| A. Prozessuale Besonderheiten bei Urheberrechtsstreitigkeiten . . . . .              | 359 |
| I. Zuständigkeit der Gerichte . . . . .                                              | 359 |
| 1. Urheberrechtsstreitigkeiten . . . . .                                             | 359 |
| 2. Gerichtsstand bei unerlaubten Handlungen . . . . .                                | 360 |
| 3. Internationale Zuständigkeit des Gerichtes . . . . .                              | 361 |
| II. Prozessführungsbefugnis . . . . .                                                | 361 |
| III. Gewillkürte Prozessstandschaft . . . . .                                        | 362 |
| B. Einstweilige Verfügung . . . . .                                                  | 363 |
| C. Unterlassungsanspruch . . . . .                                                   | 364 |
| I. Abmahnung . . . . .                                                               | 366 |
| II. Störerhaftung und Prüfungspflichten . . . . .                                    | 367 |
| Fall 17 . . . . .                                                                    | 367 |
| 1. Anwendung des Telemediengesetzes (TMG) für Diensteanbieter . . . . .              | 368 |
| 2. Einwilligung des Rechteinhabers . . . . .                                         | 371 |
| 3. Prüfungspflichten des Störers . . . . .                                           | 372 |
| 4. Störerhaftung von Verbrauchern und Gewerbetreibenden . . . . .                    | 375 |
| 5. Vorbeugender Unterlassungsanspruch wegen einer Erstbegehungs-<br>gefahr . . . . . | 378 |
| Lösung Fall 17 . . . . .                                                             | 380 |
| III. Beseitigungsanspruch . . . . .                                                  | 380 |
| IV. Schutzschrift . . . . .                                                          | 380 |

|                                                                                                                                                | Seite |
|------------------------------------------------------------------------------------------------------------------------------------------------|-------|
| D. Schadensersatzanspruch                                                                                                                      | 381   |
| I. Allgemeines                                                                                                                                 | 381   |
| II. Voraussetzungen                                                                                                                            | 382   |
| 1. Verletzungshandlung                                                                                                                         | 382   |
| 2. Rechtswidrigkeit                                                                                                                            | 384   |
| 3. Verschulden                                                                                                                                 | 384   |
| III. Berechnungsarten des Vermögensschadens                                                                                                    | 385   |
| 1. Entgangener Gewinn                                                                                                                          | 387   |
| 2. Der Verletzergeinn als Bemessungsgrundlage                                                                                                  | 388   |
| 3. Angemessene Lizenzgebühr                                                                                                                    | 389   |
| Fall 18                                                                                                                                        | 389   |
| Lösung (a) Fall 18                                                                                                                             | 391   |
| Lösung (b) Fall 18                                                                                                                             | 393   |
| IV. Verletzung des Urheberpersönlichkeitsrechts und Nichtvermögensschaden                                                                      | 393   |
| E. Ansprüche aus anderen gesetzlichen Vorschriften                                                                                             | 395   |
| F. Auskunftsanspruch gegen Dritte                                                                                                              | 396   |
| G. Vernichtungsanspruch, Rückrufsanspruch und Anspruch auf Überlassung                                                                         | 401   |
| H. Vorlage- und Besichtigungsanspruch                                                                                                          | 402   |
| I. Verjährung der Ansprüche                                                                                                                    | 404   |
| J. Zwangsvollstreckung                                                                                                                         | 405   |
| I. Urheber oder Rechtsnachfolger als Vollstreckungsschuldner                                                                                   | 406   |
| II. Zwangsvollstreckung wegen Geldforderungen gegen den Verfasser wissenschaftlicher Ausgaben und gegen Lichtbildner und ihre Rechtsnachfolger | 407   |
| III. Zwangsvollstreckung wegen Geldforderungen in bestimmte Vorrichtungen                                                                      | 408   |
| Wiederholungsfragen                                                                                                                            | 408   |

## 11. Kapitel – Urheberstrafrecht

|                                                                                                                              |     |
|------------------------------------------------------------------------------------------------------------------------------|-----|
| A. Straftatbestände der §§ 106 bis 108b UrhG                                                                                 | 409 |
| I. Unerlaubte Verwertung urheberrechtlich geschützter Werke, § 106 UrhG                                                      | 410 |
| Fall 19                                                                                                                      | 410 |
| Lösung Fall 19                                                                                                               | 412 |
| II. Unerlaubte Eingriffe in verwandte Schutzrechte, § 108 UrhG                                                               | 413 |
| III. Unzulässiges Anbringen der Urheberbezeichnung, § 107 UrhG                                                               | 414 |
| Fall 20                                                                                                                      | 414 |
| Lösung Fall 20                                                                                                               | 415 |
| IV. Unerlaubte Eingriffe in technische Schutzmaßnahmen und in zur Rechtewahrnehmung erforderliche Informationen, § 108b UrhG | 416 |
| V. Gewerbsmäßiges Handeln, §§ 108a, 108b Abs. 3 UrhG                                                                         | 416 |
| VI. Subjektiver Tatbestand                                                                                                   | 417 |

|                                            |              |
|--------------------------------------------|--------------|
| VII. Rechtswidrigkeit und Schuld . . . . . | Seite<br>417 |
| VIII. Strafverfolgung . . . . .            | 417          |
| Wiederholungsfragen . . . . .              | 421          |

## 12. Kapitel – Einigungsvertrag

|                                                                                                                        |     |
|------------------------------------------------------------------------------------------------------------------------|-----|
| A. Einigungsvertrag und Urheberrecht . . . . .                                                                         | 423 |
| B. Anwendung des URG auf Werke, die vor dem Beitritt am 3.10.1990<br>geschaffen wurden, § 1 Abs. 1 S. 1 EVtr . . . . . | 423 |
| C. Schutzfristen, § 1 Abs. 1 S. 2 EVtr . . . . .                                                                       | 423 |
| D. Altverträge . . . . .                                                                                               | 424 |
| E. Urheberpersönlichkeitsrechte . . . . .                                                                              | 428 |
| Wiederholungsfragen . . . . .                                                                                          | 429 |

## 13. Kapitel – Internationales Urheberrecht und Kollisionsrecht

|                                                                                         |     |
|-----------------------------------------------------------------------------------------|-----|
| A. Einleitung und Begriffsklärung . . . . .                                             | 430 |
| B. Nationales Fremdenrecht . . . . .                                                    | 430 |
| I. Räumlicher Anwendungsbereich des UrhG . . . . .                                      | 430 |
| II. Persönlicher Anwendungsbereich des UrhG . . . . .                                   | 431 |
| 1. Der Schutz von inländischen Urhebern und Leistungsschutz-<br>berechtigten . . . . .  | 431 |
| Fall 21 . . . . .                                                                       | 431 |
| Lösung Fall 21 . . . . .                                                                | 432 |
| 2. Der Schutz von ausländischen Urhebern und Leistungsschutz-<br>berechtigten . . . . . | 432 |
| Fall 22 . . . . .                                                                       | 432 |
| Lösung Fall 22 . . . . .                                                                | 434 |
| C. Kompensatorisches Fremdenrecht . . . . .                                             | 434 |
| I. Urheberrechtsabkommen . . . . .                                                      | 435 |
| 1. Revidierte Berner Übereinkunft . . . . .                                             | 435 |
| a) Anwendungsbereich . . . . .                                                          | 435 |
| b) Schutzprinzipien . . . . .                                                           | 436 |
| aa) Inländerbehandlung . . . . .                                                        | 436 |
| bb) Mindestrechte . . . . .                                                             | 437 |
| 2. Welturheberrechtsabkommen . . . . .                                                  | 437 |
| a) Anwendungsbereich . . . . .                                                          | 438 |
| b) Schutzprinzipien . . . . .                                                           | 438 |
| 3. WIPO-Urheberrechtsvertrag . . . . .                                                  | 438 |
| 4. Sonstige Urheberrechtsabkommen . . . . .                                             | 439 |
| II. Leistungsschutzabkommen . . . . .                                                   | 439 |
| 1. Rom-Abkommen . . . . .                                                               | 439 |

## Inhaltsverzeichnis

|                                                                                                               | Seite |
|---------------------------------------------------------------------------------------------------------------|-------|
| a) Anwendungsbereich . . . . .                                                                                | 439   |
| b) Schutzprinzipien . . . . .                                                                                 | 440   |
| 2. WIPO-Vertrag über Darbietungen und Tonträger . . . . .                                                     | 440   |
| 3. Sonstige Leistungsschutzabkommen . . . . .                                                                 | 441   |
| III. TRIPS-Abkommen . . . . .                                                                                 | 441   |
| D. Kollisionsrecht . . . . .                                                                                  | 442   |
| I. Urheberrechtsstatut . . . . .                                                                              | 442   |
| Fall 23 . . . . .                                                                                             | 442   |
| Lösung Fall 23 . . . . .                                                                                      | 445   |
| II. Vertragsstatut . . . . .                                                                                  | 446   |
| Fall 24 . . . . .                                                                                             | 446   |
| Lösung Fall 24 . . . . .                                                                                      | 447   |
| E. Internationale Zuständigkeit deutscher Gerichte und die Anerkennung ausländischer Entscheidungen . . . . . | 448   |
| Fall 25 . . . . .                                                                                             | 448   |
| Lösung Fall 25 . . . . .                                                                                      | 452   |
| F. Europäischer Urheberrechtsschutz . . . . .                                                                 | 452   |
| Fall 26 . . . . .                                                                                             | 452   |
| I. Notwendigkeit europarechtlicher Regelungen . . . . .                                                       | 452   |
| II. EU-Richtlinien auf dem Gebiet des Urheberrechts . . . . .                                                 | 453   |
| III. Rechtsprechung des EuGH . . . . .                                                                        | 457   |
| Lösung Fall 26 . . . . .                                                                                      | 460   |
| Wiederholungsfragen . . . . .                                                                                 | 460   |

## Anhang

|                                                                            |     |
|----------------------------------------------------------------------------|-----|
| Auswahl höchstrichterlicher Entscheidungen zum Urheberrecht . . . . .      | 463 |
| I. Entscheidungen des BGH zu den einzelnen Bestimmungen des UrhG . . . . . | 463 |
| II. Entscheidungen des BVerfG . . . . .                                    | 478 |
| III. Entscheidungen des EuGH . . . . .                                     | 479 |
| Verzeichnis der abgekürzt zitierten Literatur . . . . .                    | 481 |
| Sachregister . . . . .                                                     | 517 |
